# Supplementary material
Source: PubMed Central journal article supplement (PMC6390492)
Supplement: NIHMS1005067-supplement-fig_S1.pdf [file NIHMS1005067-supplement-fig_S1.pdf]

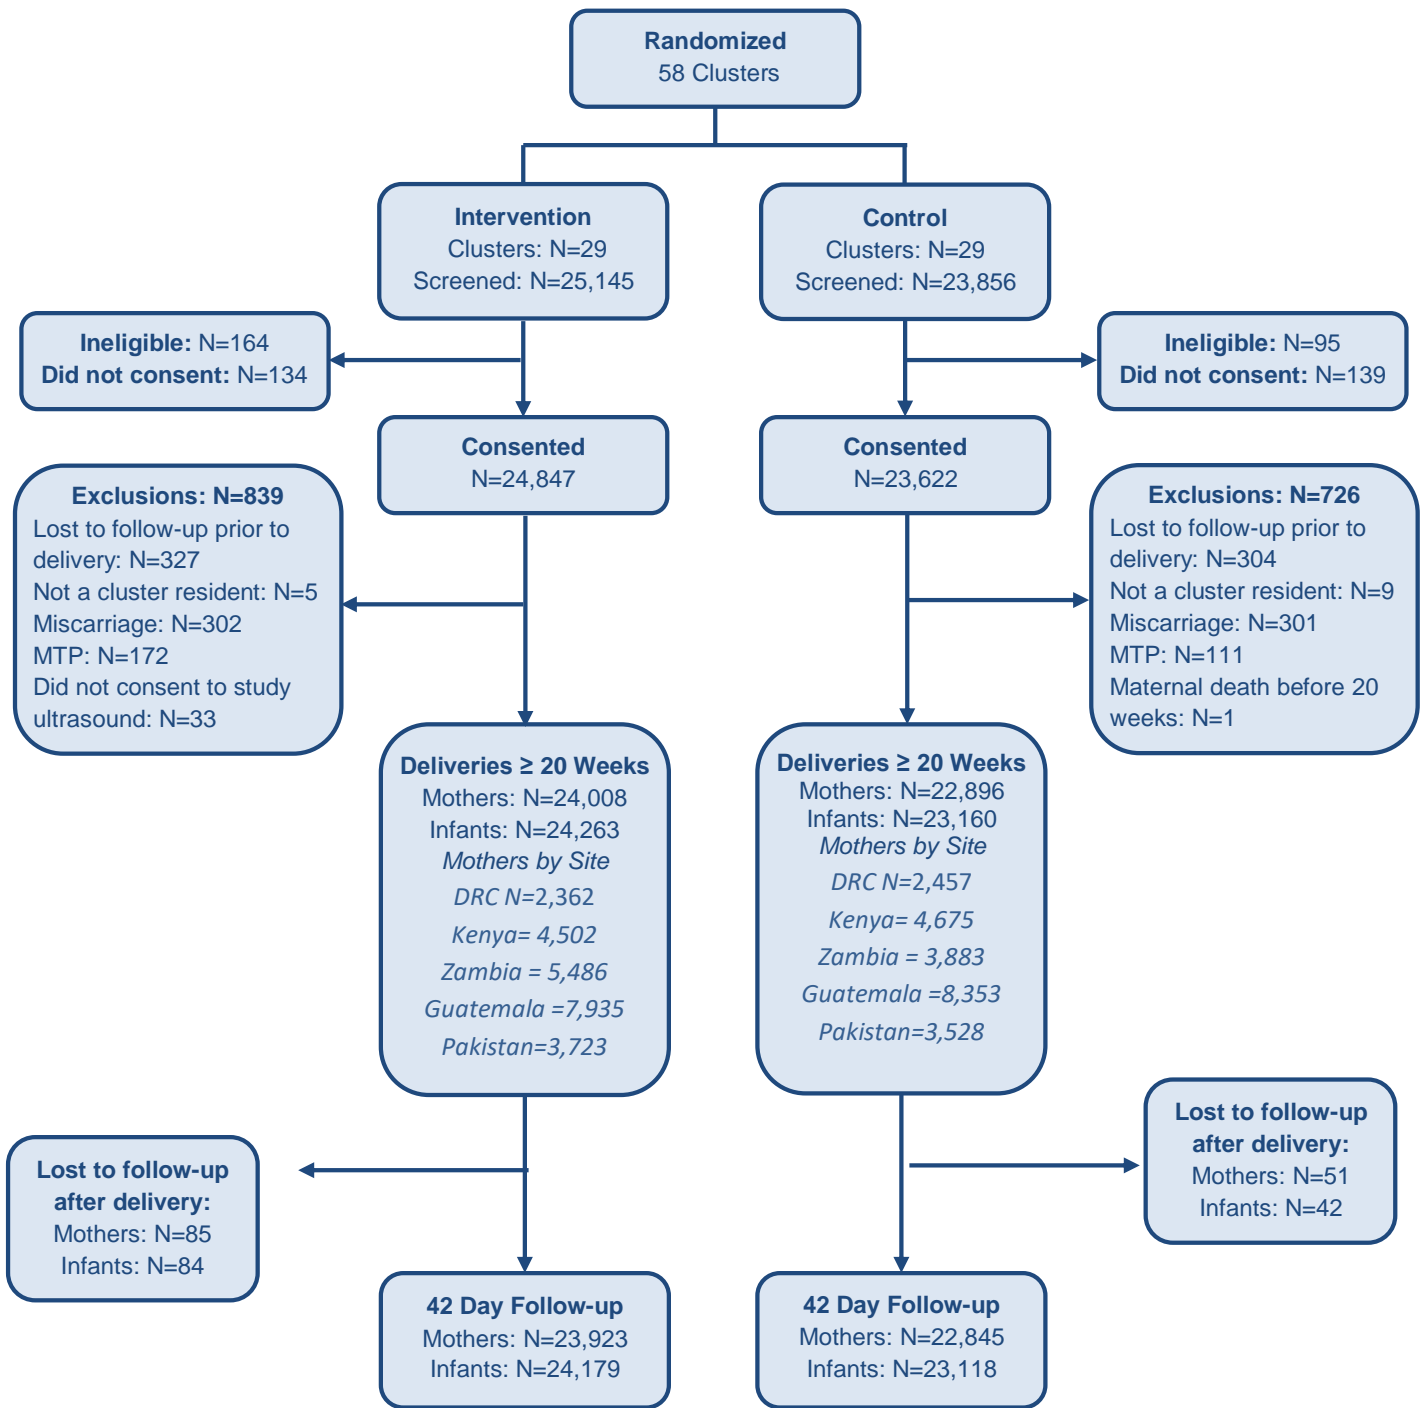

**Figure S1.** First Look Trial CONSORT Diagram.
