# Supplementary material
Source: PubMed Central journal article supplement (PMC6390492)

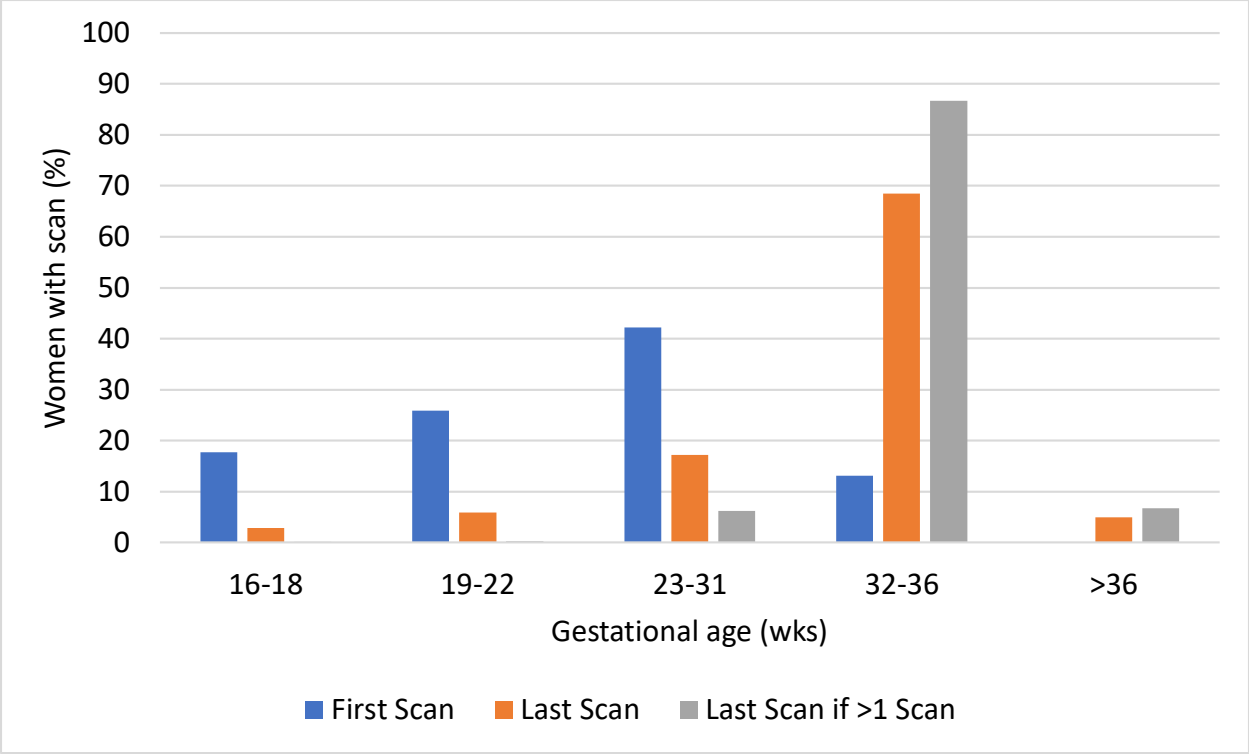

Figure S2. Gestational Age at First and Last Ultrasound Examination.

Supplement: NIHMS1005067-supplement-Fig_S2.pdf [file NIHMS1005067-supplement-Fig_S2.pdf]
